# Supplementary material
Source: HighWire-hosted journal article supplement (https://rc.rcjournal.com/highwire/filestream/19795/field_highwire_adjunct_files/0/suppl_1.pdf)
Supplement: suppl_1.pdf [file suppl_1.pdf]

# Intubation Checklist

## Respiratory Therapy

| Task                                                                                            | Task Completed           |
|-------------------------------------------------------------------------------------------------|--------------------------|
| Preoxygenated with 100% Oxygen 5 minutes                                                        | <input type="checkbox"/> |
| Airway cart present                                                                             | <input type="checkbox"/> |
| Equipment checked and present                                                                   | <input type="checkbox"/> |
| <ul style="list-style-type: none"><li>• Blade lights / glidescope</li></ul>                     | <input type="checkbox"/> |
| <ul style="list-style-type: none"><li>• ETT with stylet and balloon checked</li></ul>           | <input type="checkbox"/> |
| <ul style="list-style-type: none"><li>• Working suction</li></ul>                               | <input type="checkbox"/> |
| <ul style="list-style-type: none"><li>• Ambu Bag with connection to oxygen</li></ul>            | <input type="checkbox"/> |
| <ul style="list-style-type: none"><li>• ETCO2 or capnography</li></ul>                          | <input type="checkbox"/> |
| <ul style="list-style-type: none"><li>• Oropharyngeal airway or nasopharyngeal airway</li></ul> | <input type="checkbox"/> |

## Nursing

| Task                                                                       | Task Completed           |
|----------------------------------------------------------------------------|--------------------------|
| Medications for induction and paralysis drawn up and labeled appropriately | <input type="checkbox"/> |
| Appropriate IV access is established and flushed to ensure patency         | <input type="checkbox"/> |
| Vasopressor available if concern for hypotension (push dose or infusion)   | <input type="checkbox"/> |
| Blood pressure cuff and working pulse oximetry on different arms           | <input type="checkbox"/> |
| Blood pressure cycles every 3 minutes                                      | <input type="checkbox"/> |
| Check for and remove dentures/partials                                     | <input type="checkbox"/> |

## Physician/APP

| Task                                                                                                                                                                                | Task Completed           |
|-------------------------------------------------------------------------------------------------------------------------------------------------------------------------------------|--------------------------|
| Briefing of plan with full attention of everyone in the room <ul style="list-style-type: none"><li>• Plan for medications (including dose), intubation, and rescue method</li></ul> | <input type="checkbox"/> |
| Role Designation                                                                                                                                                                    | <input type="checkbox"/> |
| <ul style="list-style-type: none"><li>• Respiratory therapist - Ambu bag, capnography, oral/nasal airway, ETT</li></ul>                                                             | <input type="checkbox"/> |
| <ul style="list-style-type: none"><li>• Nurse #1 – medications and vasopressors</li></ul>                                                                                           | <input type="checkbox"/> |
| <ul style="list-style-type: none"><li>• RT #2 - observing monitor, auscultating after tube placement</li></ul>                                                                      | <input type="checkbox"/> |
| <ul style="list-style-type: none"><li>• Runner for extra supplies / medications</li></ul>                                                                                           | <input type="checkbox"/> |
| Discuss anticipated complications – difficult airway, hypotension, hypoxemia                                                                                                        | <input type="checkbox"/> |
